# Supplementary material for: Hydrothermal Processing of Laminaria ochroleuca for the Production of Crude Extracts Used to Formulate Polymeric Nanoparticles
Source: PubMed Central journal article supplement (PMC7401254; doi:10.3390/md18070336), 2020-06-27
Supplement: marinedrugs-18-00336-s001.pdf [file marinedrugs-18-00336-s001.pdf]

a)

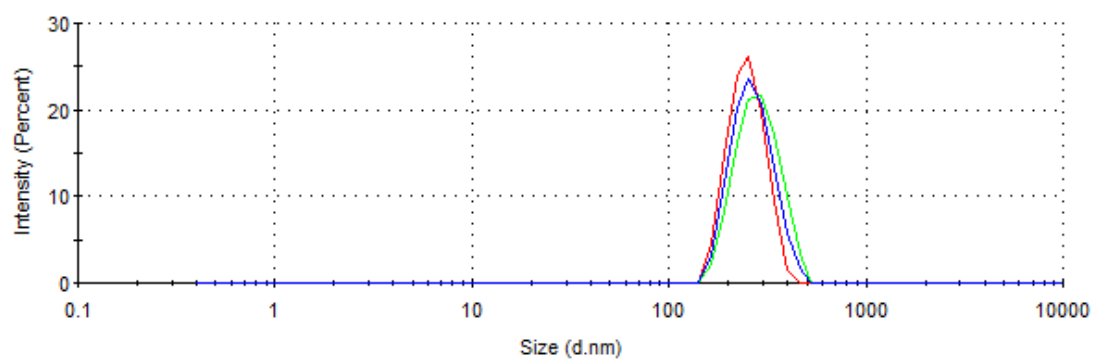

b)

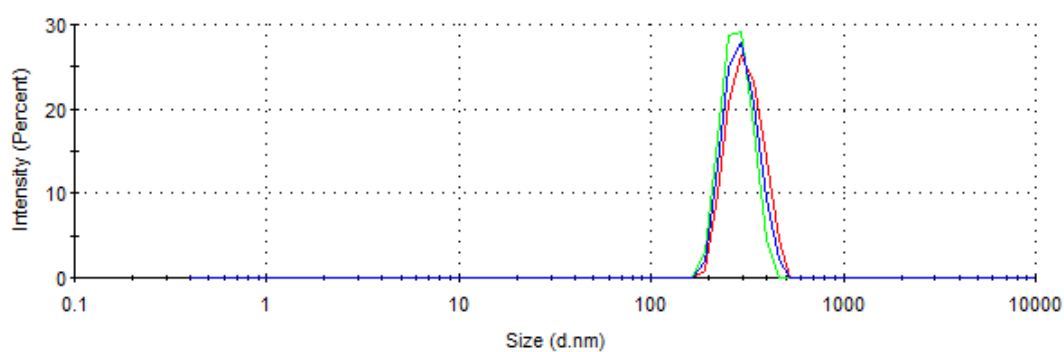

c)

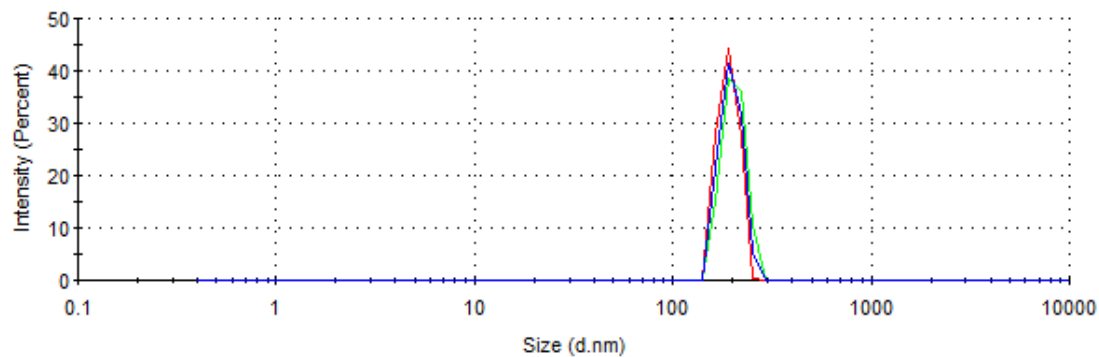

d)

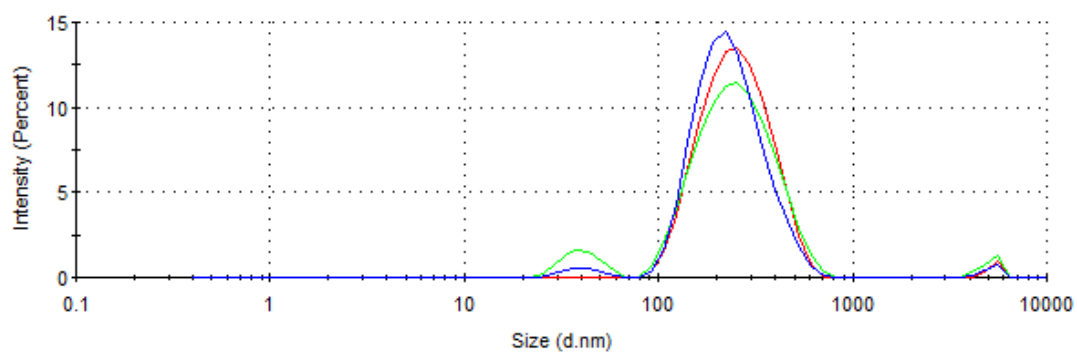

**Figure S1.** Size distribution by intensity of the nanoparticles FUCe/CS (4/1 ratio, w/w) using the extract of *Laminaria ochroleuca* obtained by autohydrolysis at 70 °C (a), 80 °C (b), 90 °C (c) and 100 °C (d).

a)

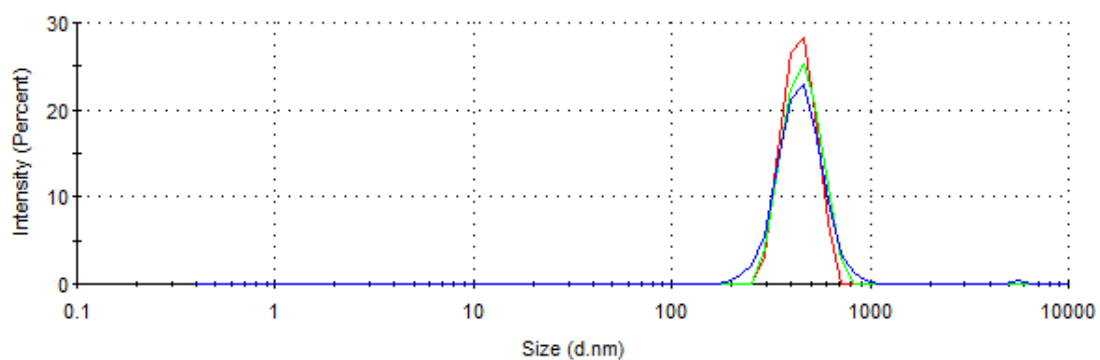

b)

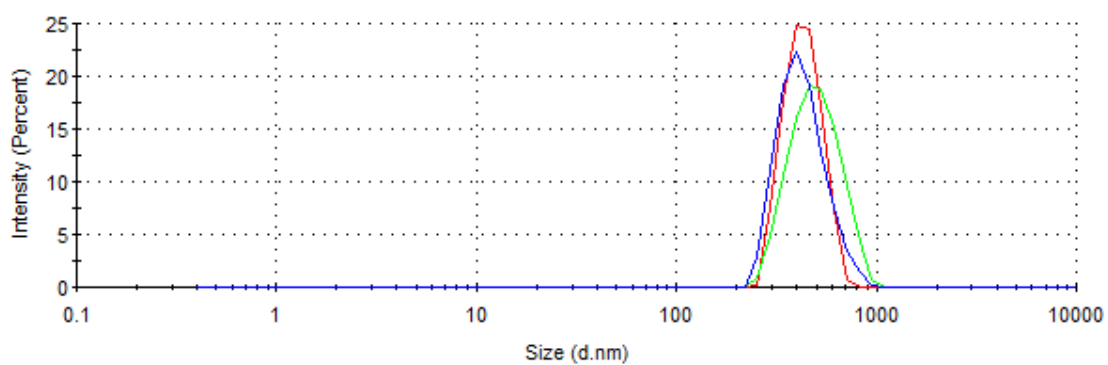

c)

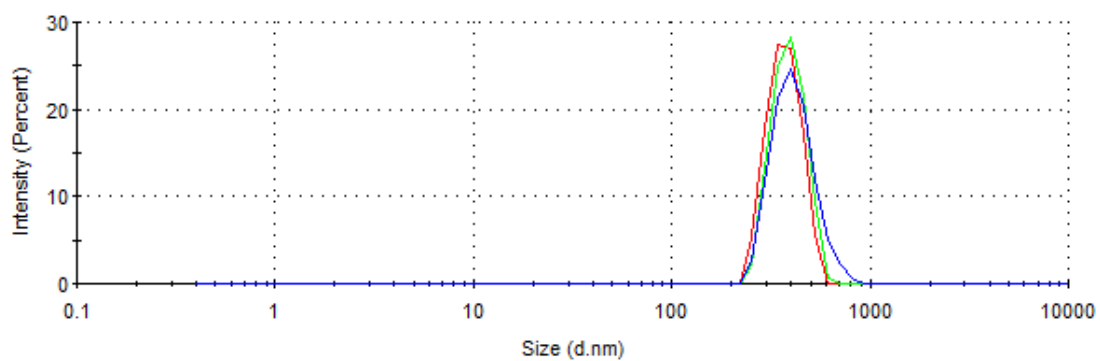

d)

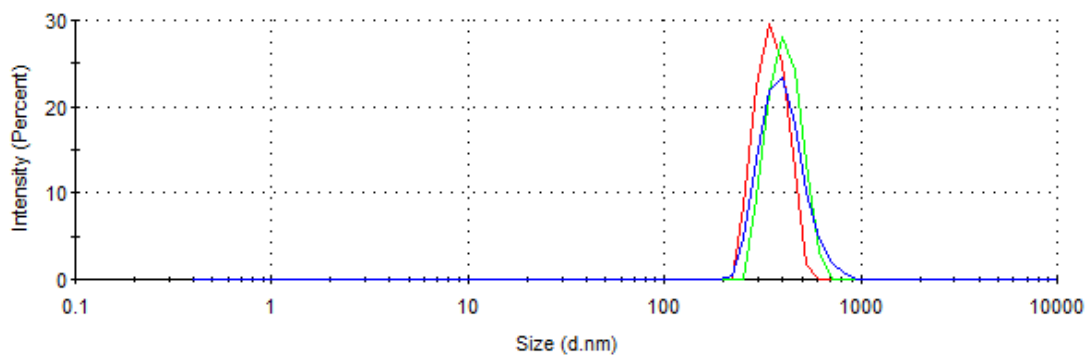

**Figure S2.** Size distribution by intensity of the nanoparticles CS/FUCe (1/4 ratio, w/w) using the extract of *Laminaria ochroleuca* obtained by autohydrolysis at 70 °C (a), 80 °C (b), 90 °C (c) and 100 °C (d).

**Table S1.** Polydispersity index (PDI) of the FUCe/CS and CS/FUCe nanoparticles produced with FUCe obtained at different temperatures (from 70 to 100 °C) and different ratios (4/1, 1/1 and 1/4). Data represent mean  $\pm$  standard deviation (SD) ( $n \geq 3$ ).

| Temperature | Ratio | PDI             |                 |
|-------------|-------|-----------------|-----------------|
|             |       | FUCe/CS         | CS/FUCe         |
| 70 °C       | 4/1   | 0.29 $\pm$ 0.06 | 0.44 $\pm$ 0.13 |
|             | 1/1   | 0.44 $\pm$ 0.01 | 0.36 $\pm$ 0.11 |
|             | 1/4   | 0.58 $\pm$ 0.02 | 0.28 $\pm$ 0.08 |
| 80 °C       | 4/1   | 0.35 $\pm$ 0.03 | 0.49 $\pm$ 0.07 |
|             | 1/1   | 0.47 $\pm$ 0.01 | 0.42 $\pm$ 0.07 |
|             | 1/4   | 0.49 $\pm$ 0.02 | 0.40 $\pm$ 0.01 |
| 90 °C       | 4/1   | 0.38 $\pm$ 0.12 | 0.57 $\pm$ 0.08 |
|             | 1/1   | 0.57 $\pm$ 0.06 | 0.60 $\pm$ 0.10 |
|             | 1/4   | 0.46 $\pm$ 0.06 | 0.34 $\pm$ 0.05 |
| 100 °C      | 4/1   | 0.40 $\pm$ 0.01 | 0.69 $\pm$ 0.10 |
|             | 1/1   | 0.44 $\pm$ 0.06 | 0.50 $\pm$ 0.05 |
|             | 1/4   | 0.49 $\pm$ 0.10 | 0.37 $\pm$ 0.07 |
